# Supplementary material for: The role of light and vision in farmed ungulates and implications for their welfare
Source: Frontiers journal article supplement (doi:10.3389/fanim.2024.1433181), 2025-01-28
Supplement: Table_1.xlsx [file Table_1.xlsx]

## Sheet: Tabelle1
Supplementary Table 1: Selected studies on photoperiod, illumination, and color showing different study foci and setups.
Visual parameters	Species	Criteria tested	What was tested exactly	How was it tested	Reference
photoperiod	pig	physiological performance	weight gain	> 1h light vs. 16h light	Stevenson et al. (1983)
			feed intake and lactation weight loss, piglet weaning weight and mortality	1h light vs. 16h light; partly combined with high temperatures	McGlone et al. (1988)
			weight gain, feed intake, feed conversion rate	8h light vs. 14h light at 40 lux	Martelli et al. (2005)
			weight gain, feed intake, feed conversion rate	8h light vs. 16h light at 40 lux	Martelli et al. (2015)
		behavior	standing, sitting, lying, earting, drinking, biting, pawing, exploring	8h light vs. 14h light at 40 lux	Martelli et al. (2005)
			mouting, aggression	8h light vs. 11h light vs. 13h light at 60lux; 14h light vs. 18h light at 440 lux	Fredriksen et al. (2006)
			standing, sitting, lying, earting, drinking, biting, pawing, exploring	8h light vs. 16h light at 40 lux	Martelli et al. (2015)
	sheep	physiological performance	milk yield and composition, weight, food intake	15.5 h light vs. 8.5 h light	Bocquier et al. (1990)
			weight gain, feed intake	8h light vs. 12h light vs. 16h light	Casamassima et al. (1990)
			milk yield and composition, weight	natual daylight vs. 16h light at 550 lux	Morrissey et al. (2008)
		behavior	ingestive behavior, voluntary feed intake	natural daylight from October to April	Fischer et al. (1997)
	goat	physiological performance	milk yield and components, progesterone determinations, body weight, feed intake	group 1: natural photoperiod (13h light) vs. group 2: natural period (13h) followed by 20h light vs. Group 3: 20h light from the beginning	Garcia-Hernandez et al. (2007)
			milk yield, ovarian activity	16h light vs. < 13h light	Veliz et al. (2009)
			milk composition	natural daylight vs. elongated artificial + natural daylight (16h)	Russo et al. (2013)
			milk yield	natural photoperiod (11h) vs long-day photoperiod (16 h); both with/without nutritional supplementation	Flores et al. (2015)
			body weight	Natural (varied) vs. artificial photoperiod (16 h light)	Flores et al. (2018)
		behavior	rumination	1h light vs. 23h light	Oshiro et al. (1996)
			sexual activity	artificial long photoperiod stimulate sexual activity during the 'on-breeding season	Delgadillo et al. (2002), Delgadillo et al. (2004)
			total daily motor activity	photoperiod length during vernal equinox, summer solstice, autumn equinox and winter solstice	Piccione et al. (2008)
			sexual stimulating effect of bucks	natual daylight (10h - 13h) vs. 16h natural + artificial light (7h at 300 lux)	Rivas-Munoz et al. (2010)
	cattle	physiological performance	weight gain, milk yield	9 - 12h light at 39 - 93 lux vs. 16h light at 114 - 207 lux	Peters et al. (1978)
			milk production, food intake	9 - 12h natural daylight vs. 16h fluorescent light	Peters et al. (1981)
			milk yield and composition, weight, food intake	8h natural daylight vs. natural + 18h artificial light (10h at 481 lux)	Phillips and Schofield (1989)
			weight gain	10.5h light vs. 18h light	Weiguo and Phillips (1991)
			milk-fed calves rearing costs, consumption of concentrate and occurrence of diarrhea	3 different roofing materials + 3 different light duration (12, 16 and 20 h)	de Almeida et al. (2015)
		behavior	activity pattern	8h natural daylight vs. natural + 18h artificial light (10h at 481 lux)	Phillips and Schofield (1989)
			standing, lying, agonistic behaviors	10.5 h light vs. 18h light	Weiguo and Phillips (1991)
			activity pattern	36h darkness (except 4h lit period) vs. 36h light	Andersson (2012)
			activity pattern	13h light vs. 16h light (150 lux, LED-light)	Bernhart et al. (2018)
	horse	behavior	activity pattern	natural daylight throuthout the year (seasonal variation)	Bertolucci et al. (2008)
illumination	pig	preference	time spent in light/dark areas	10 lux vs. 110 lux	Baldwin and Start (1985)
			time spent in light/dark areas	2.5 lux vs. 90 lux	Anderson et al. (2000)
			several behaviors (e.g. lying, sitting, standing, eating, interacting, investigating, urination)	2.4 lux vs. 4 lux vs. 40 lux vs. 400 lux	Taylor et al. (2006)
			feeding time, activity	light color temperatures of 3000 K vs. 6500 K (at 80 lux)	Götz et al. (2020)
			lying, eating, acitivity	0 lux vs. 600 lux at 6500 K	Götz et al. (2022)
		physiological performance	birth weight, weaning weight, mortality rate, growth rate	50 lux vs. 400 lux vs. 500 lux vs. 700 lux	Mutton (1987)
			feed intake, body weight, feed converion rate	TP/PR light (TP = Triphosphor lighting to simulate daylight during the day, PR = Pascal red lighting during the night) vs. cool-white light (during the day only)	Glatz (2001)
			growth, carcass parameters	40 lux vs. 80 lux (each for 12h per day)	Martelli et al. (2010)
			daily weight gain, carcass parameters, health parameters	45 lus vs. 198 lux vs. 968 lux vs. 71 - 330 lux (gradient)	Scaillietez et al. (2024)
		behavior	aggessive and social behavior	TP/PR light (TP = Triphosphor lighting to simulate daylight during the day, PR = Pascal red lighting during the night) vs. cool-white light (during the day only)	Glatz (2001)
			aggressive behavior	60 lux artificial light vs. 440 lux artificial light + daylight through windows	Fredriksen et al. (2006)
			drinking, lying, agonisitc behaviors, tactile social interactions	40 lux vs. 80 lux (each for 12h per day)	Martelli et al. (2010)
			explorative, play, social, abnormal behavior, mounting	45 lus vs. 198 lux vs. 968 lux vs. 71 - 330 lux (gradient)	Scaillietez et al. (2024)
	sheep	physiological performance	prolonged lactation	16h light, 200 lux + 8h darkness	Mösenbacher-Molterer (2018)
		behavior	eating, activity levels	10 lux. vs. 100 lux. vs. 1000 lux	Casamassima et al. (1993)
			standing, resting, feeding, ruminating, exploratory activity	green light (560 nm) vs. white light (solar spectrum) vs. red light (680 nm) vs. blue (470 nm) light	Casamassima et al. (1994)
	cattle	perception	light color perception	blue light (492 nM) vs. green light (538 nm) vs. red light (610 nm)	Gilbert and Arave (1986)
			light color perception	7 colors (violet, blue, green, yellowish green, yellow, orange, red) vs. gray; same brightness	Riol et al. (1989)
		preference	preference	time spend in light, subjects could switch light on and off	Baldwin & Start (1981)
		physiological performance	milk yield and composition, weight, food intake	9h natural daylight + 10 h supplementary light at 0 vs. 101 vs. 191 vs. 529 lux	Phillips and Schofield (1989)
			milk yield and composition, hormones	normal photoperiod (14h light) vs. long day (16h light) + 50 lux vs. long day + 100 lux, long day + 200 lux	Lim et al. (2021)
			milk yield and composition	blue light vs. red light vs. white light vs. white-blue light	Lindkvist et al. (2021)
		behavior	activity (playing) and resting in calves	8 h/day of illumination (artificially by neon tubes) at 2, 20, 100 vs. 130 lx	Danenmann et al. (1985)
			activity pattern	LED illumination vs. sodium-vapor illumination; 80 lux vs. 150 lux (both LED illumination)	Bernhart et al. (2018)
			feed intake, standing, lying	blue light vs. red light vs. white light vs. white-blue light	Lindkvist et al. (2021)
	horse	physiological performance	ovarian activity, progestorone analysis	blue light (468 nm)	Murphy et al. (2014)
			heart rate parameters, body core and surface temperature, salivary cortisol levels	white light vs. red light vs. green light vs. blue light vs. yellow light (illumination 240 lux)	Burla et al. (2016)
		behavior	behavior towards new objects	natural daylight on an overcast day vs. natural daylight on a bright, cloudless day	Saslow (1999)
			several behaviors (e.g. resting behavor, oral activities, vocalisation, exporation)	white light vs. red light vs. green light vs. blue light vs. yellow light (illumination 240 lux)	Burla et al. (2016)
color	pig	perception	color perception	red vs. green vs. blue; gray vs. red or green or blue (using color cards)	Tanida et al. (1991)
		preference	drinkig time, drinking frquency	red vs. green vs. blue water dispensers	Deligeorgis et al (2006)
			feeding time, number of visits, feeding frequency	red vs. blue vs. yellow feeders	Klocek et al. (2016)
			climbing, moving, biting	red vs. blue vs. yellow balls	Babicz and Paprocka (2018)
			stay preference	white vs. green, blue, yellow or red (7-watt Ourolux® brand LED lamp)	Paggi et al. (2020)
	sheep	perception	color perception	different shades of green vs. different shades of yellow (using color cards); both varying in brightness and hue	Bazely (1988)
			color perception	red vs. gray, green vs. gray, blue vs. gray, red vs. green, and yellow vs. blue (using color cards of the same luminosity)	Tanaka et al. (1989a)
			color perception	green vs. 7 green shades (using color cards of the same luminosity)	Tanaka et al. (1989b)
			Electroretinogram (ERG) flicker photometry	photopigment basis for dichromatic color vision; S-cone 445.3, M/L-cone 552.2	Jacobs et al. (1998)
	goat	perception	color perception	discriminate orange, yellow, green, violet from gray	Buchenauer, Fritsch (1980)
			Electroretinogram (ERG) flicker photometry	photopigment basis for dichromatic color vision; S-cone 443.3, M/L-cone 552.5	Jacobs et al. (1998)
			color perception	discriminate red, green and blue patches from white of equal brightness	Siemers et al. (1999)
	cattle	perception	color perception	blue light (492 nM) vs. green light (538 nm) vs. red light (610 nm)	Gilbert and Arave (1986)
			color perception	7 colors (violet, blue, green, yellowish green, yellow, orange, red) vs. gray; same brightness	Riol et al. (1989)
			Electroretinogram (ERG) flicker photometry	photopigment basis for dichromatic color vision; S-cone 451.3, M/L-cone 555.3	Jacobs et al., 1998b
		physiological performance	Feed and water intake, rumination time and body weight	yellow, white or blue LED for 2 hr before darkness under a long‐day photoperiod (LDPP)	Elsabagh et al. (2020)
			milk yield and composition	white vs. yellow vs. white colored LEDs	Son et al. (2020)
			milk yield and composition	blue light vs. red light vs. white light vs. white-blue light	Lindkvist et al. (2021)
		behavior	reaction to fearful and novel stimuli	20 min stimulus with short, medium, and long wavelength lights in calves	Phillips and Lomas (2001)
			feed intake, standing, lying	blue light vs. red light vs. white light vs. white-blue light	Lindkvist et al. (2021)
			lying bouts and duration in lactating cows	LED wavelengths white (full-spectrum) vs. yellow–green vs. blue (for 11h/day at 280 lux)	Wilson et al. (2022)
	horse	perception	color perception	gray vs. blue or green or red	Pick et al. (1994)
			color perception	gray vs. blue or green or red or yellow (Kodak Wratten filter)	Smith and Goldman (1998)
			color perception	gray vs. blue or green or red or yellow (Kodak Wratten filter)	Macuda and Timney (1999)
		physiological performance	heart rate parameters, body core and surface temperature, salivary cortisol levels	white light vs. red light vs. green light vs. blue light vs. yellow light (illumination 240 lux)	Burla et al. (2016)
		behavior	adverse reaction	black vs. white vs. gray vs. brown vs. blue vs. green vs. yellow vs. red (mats)	Hall and Cassadays (2006)
			several behaviors (e.g. resting behavor, oral activities, vocalisation, exporation)	white light vs. red light vs. green light vs. blue light vs. yellow light (illumination 240 lux)	Burla et al. (2016)
